# Supplementary material
Source: PubMed Central journal article supplement (PMC1283375)

A

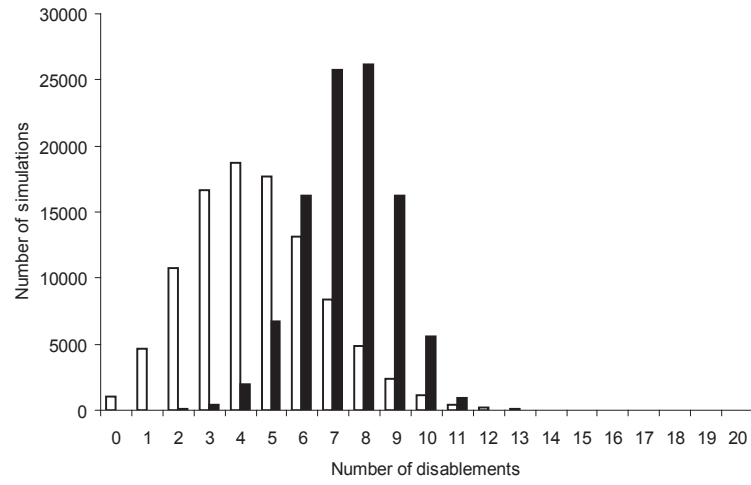

B

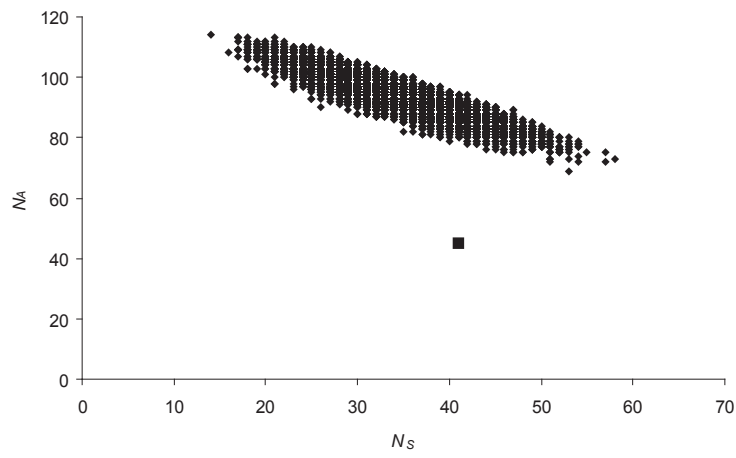

C

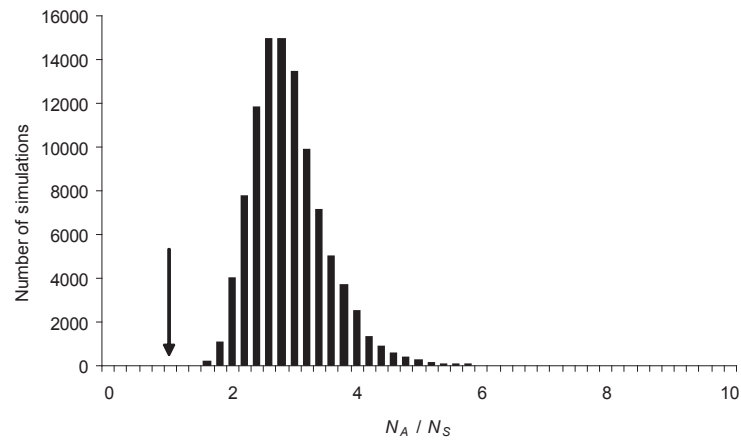

Supplement: pbio.0030357.sg003.pdf [file pbio.0030357.sg003.pdf]

A

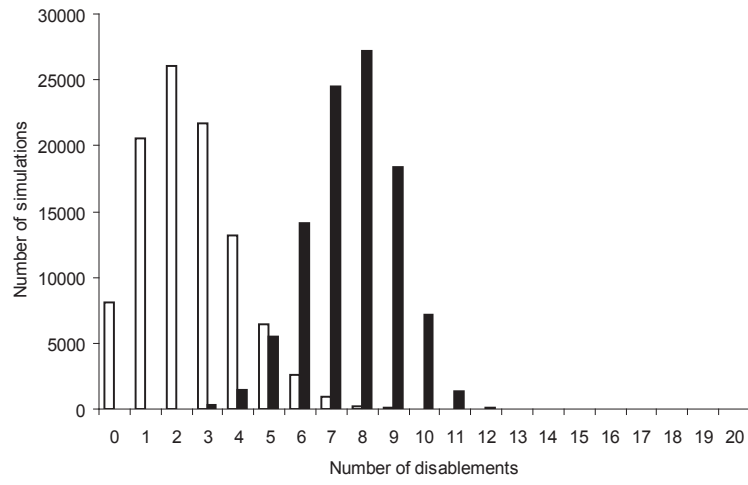

B

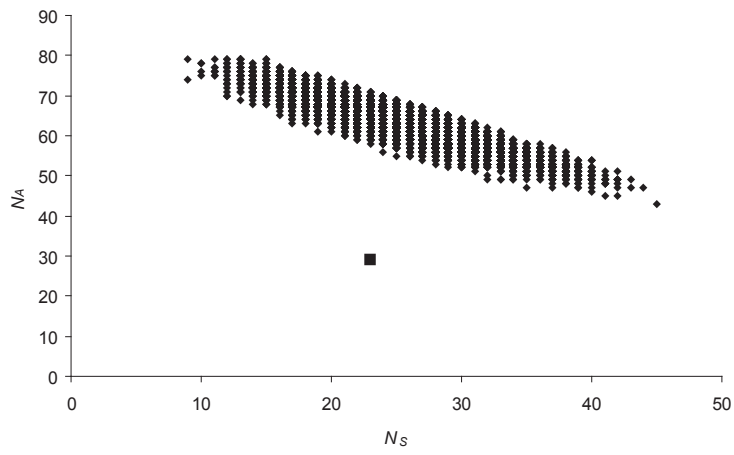

C

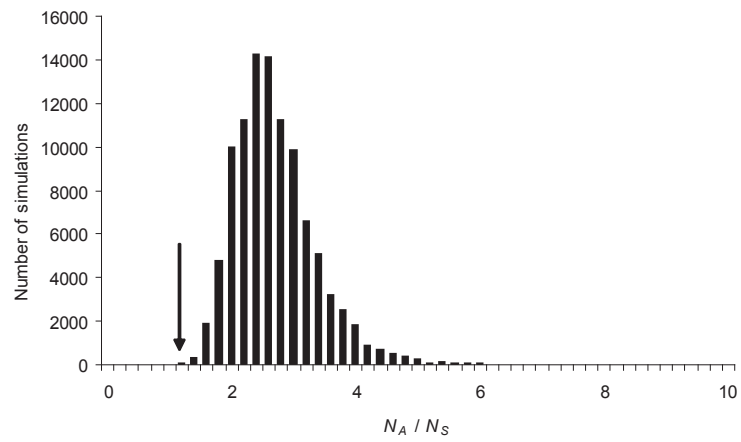

Supplement: pbio.0030357.sg004.pdf [file pbio.0030357.sg004.pdf]

A

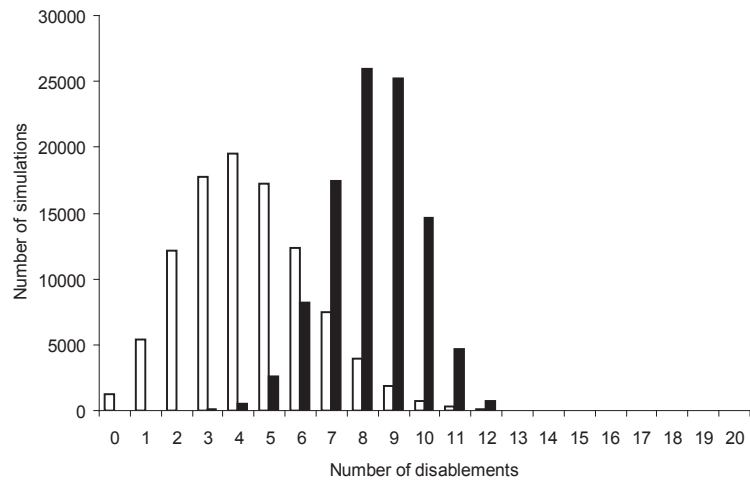

B

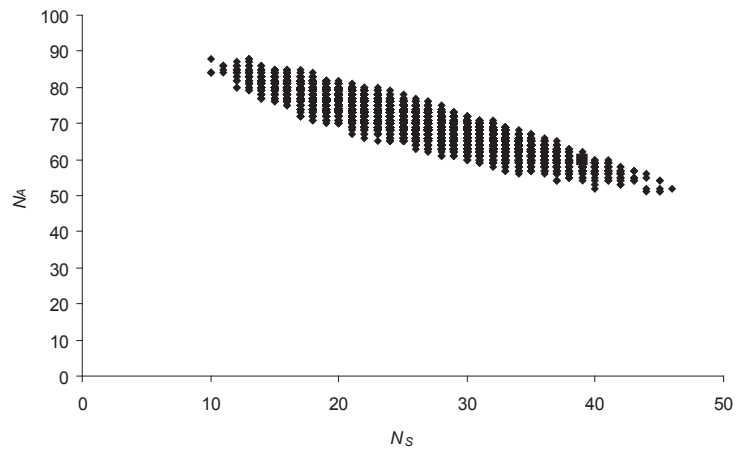

C

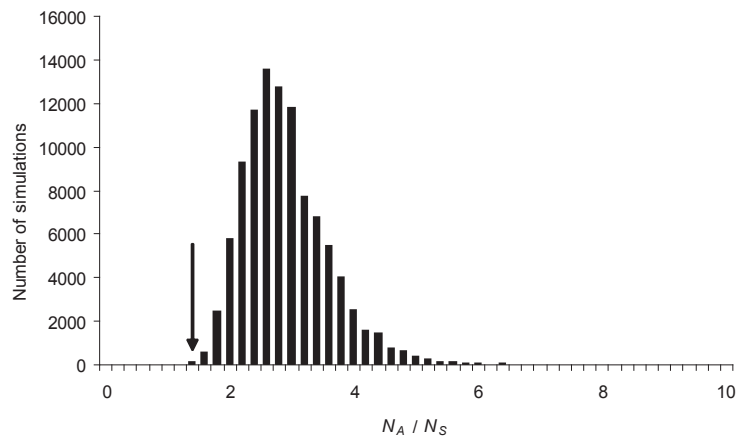

Supplement: pbio.0030357.sg005.pdf [file pbio.0030357.sg005.pdf]

A

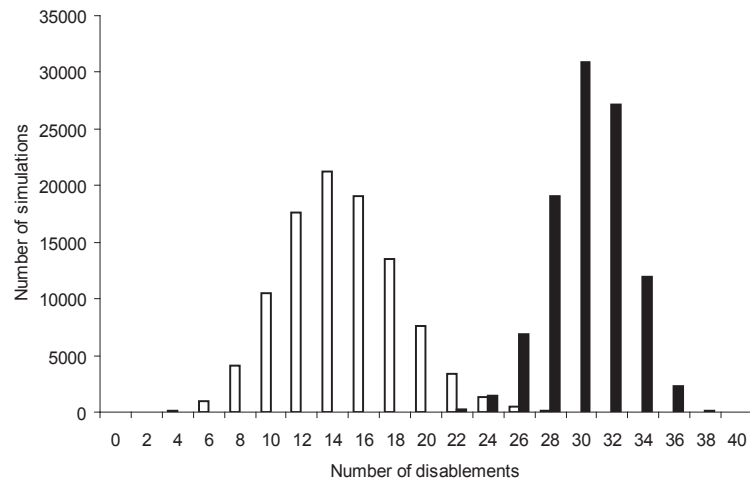

B

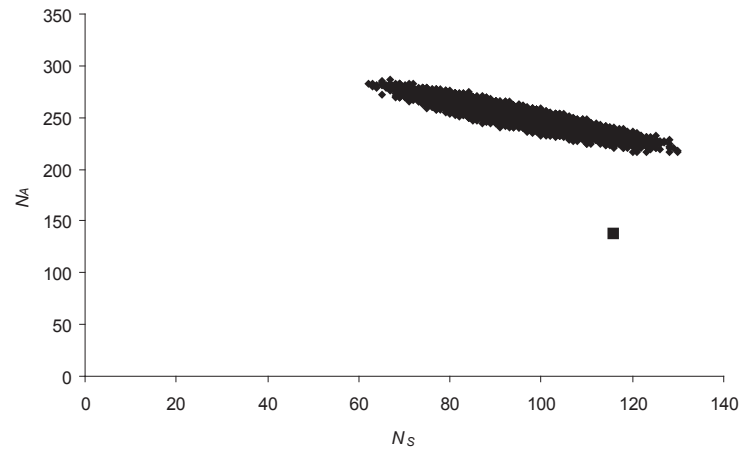

C

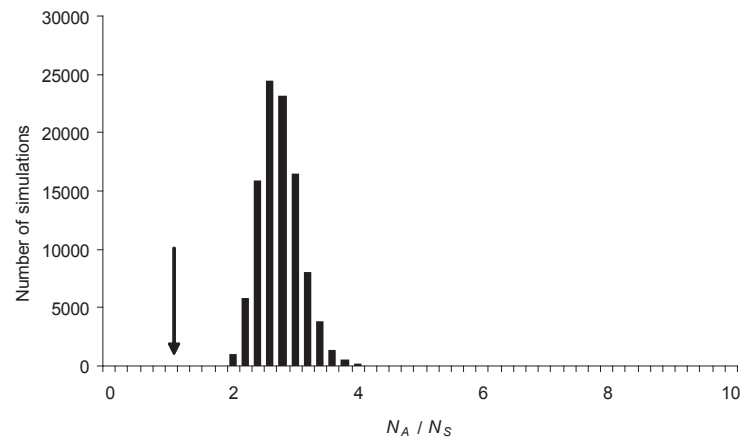

Supplement: pbio.0030357.sg006.pdf [file pbio.0030357.sg006.pdf]

A

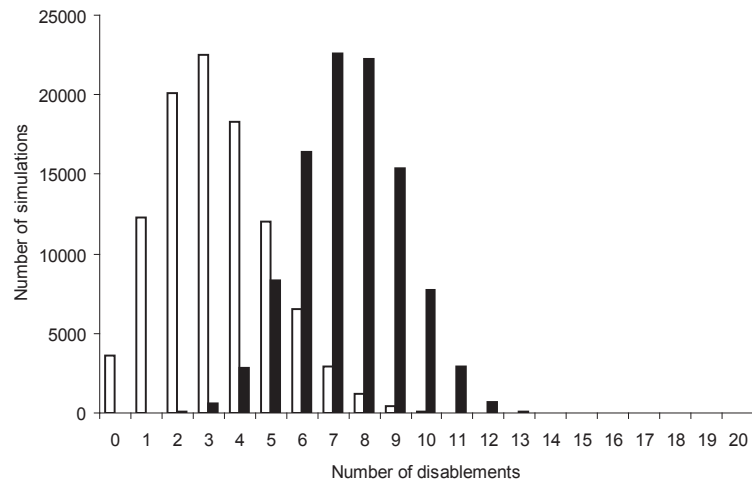

B

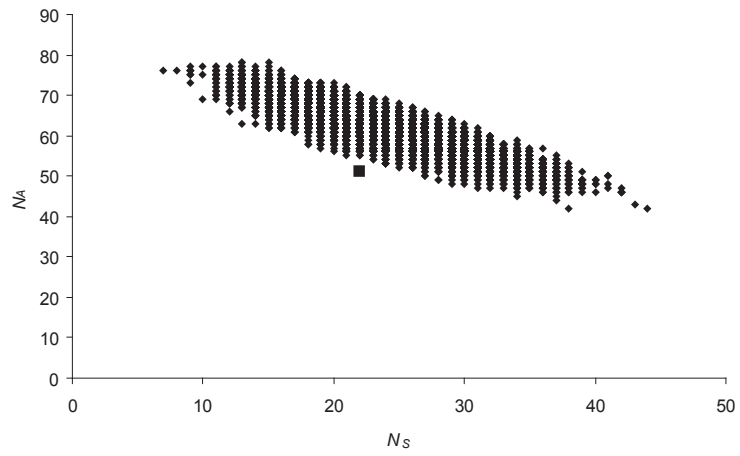

C

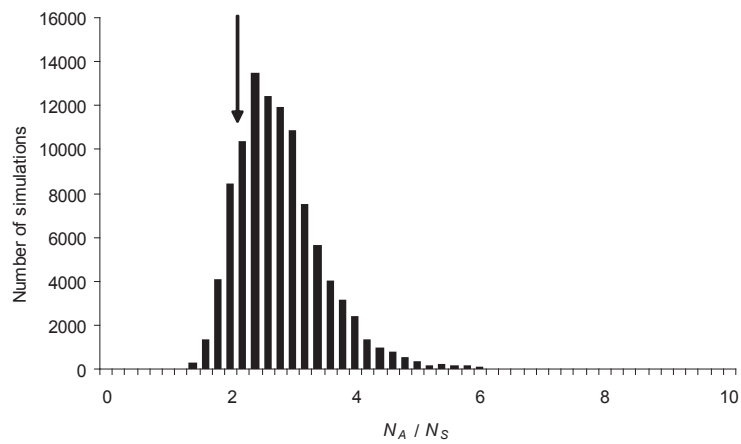

Supplement: pbio.0030357.sg007.pdf [file pbio.0030357.sg007.pdf]

A

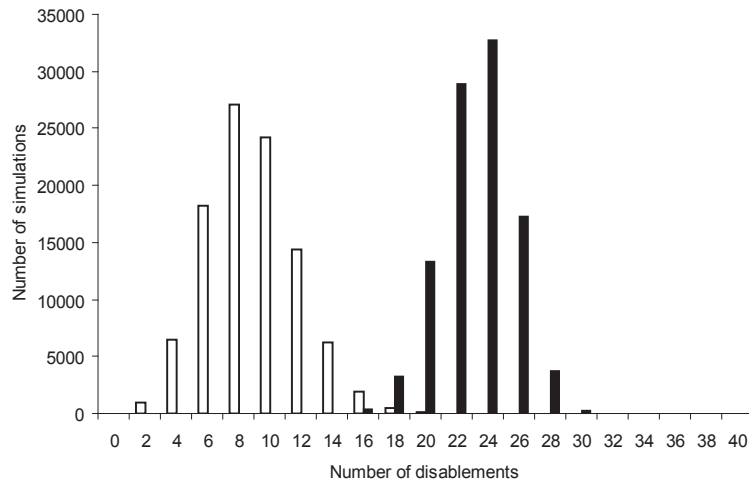

B

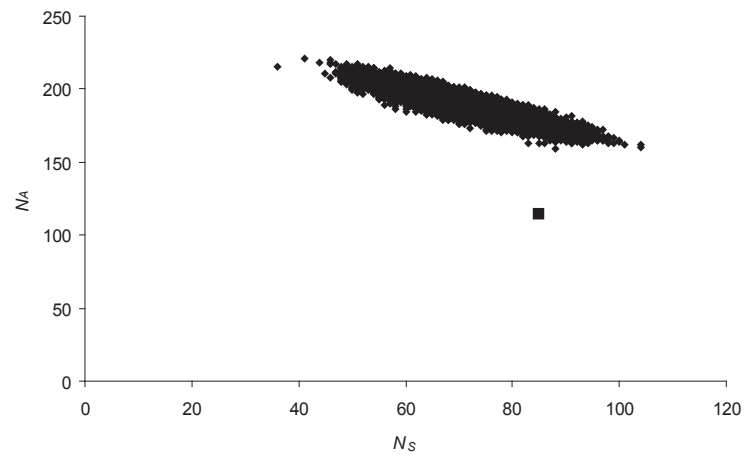

C

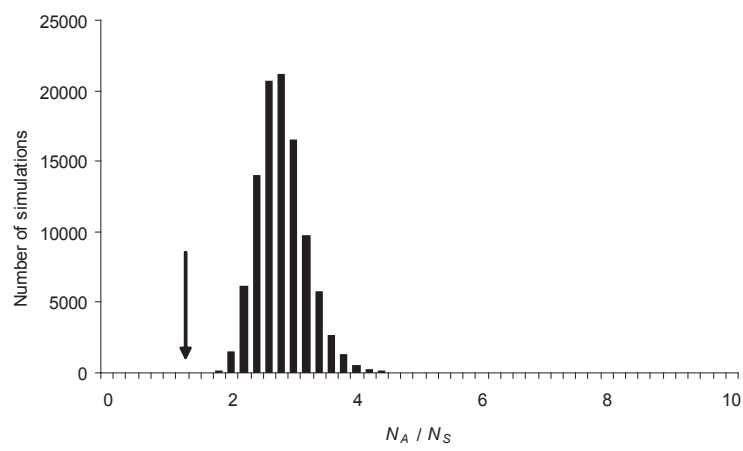

Supplement: pbio.0030357.sg008.pdf [file pbio.0030357.sg008.pdf]
